# Supplementary material for: π-Chromophore-functionalized SWNTs by covalent bonding: substantial change in the optical spectra proving strong electronic interaction
Source: Royal Society of Chemistry journal article supplement (doi:10.1039/b405962j), 2004-01-01
Supplement: b405962j.doc [file b405962j.doc]

***Electronic supplementary information (ESI)***

-Chromophore-functionalized SWNTs by covalent bonding: substantial change in the optical spectra proving strong electronic interaction

**Weihong Zhu, Nobutsugu Minami,* Said Kazaoui and Yeji Kim**

*Nanotechnology Research Institute, National Institute of Advanced Industrial Science and Technology (AIST), 1-1-1 Higashi, Tsukuba, Ibaraki 305-8565, Japan. Fax: 81 298 61 6309; Tel: 81 298 61 9385; E-mail: n.minami@aist.go.jp*

**Fig. S1** UV-Vis-Near IR absorption spectra of *a*-SWNT-CO2H and *b*-SWNT-CO2H in DMF. While the van Hove absorption bands are almost completely lost for *a-*SWNT-CO2H, they remain nearly intact for *b-*SWNT-CO2H; absorption peaks due to the first (1236, 1320 and 1430 nm) and the second bandgaps (741, 815 and 890 nm) are observed.

**Fig. S2** Near IR absorption spectra of the intermediate NI, *a*-SWNT-NI and *b*-SWNT-NI in CHCl3. The difference between *a-*SWNT-CO2H and *b-*SWNT-CO2H (shown in Fig. S1) are found to be preserved in the final products. Diffused spectra of *a*-SWNT-NI as compared with *a-*SWNT-CO2H (Fig. S1) imply the electronic perturbation due to the introduced -chromophores.

**Fig. S3** Possible resonance structure formulas of SWNT-NI. Nitrogen's isolated electron pairs in the covalent bonding bridge (-NHNH-) can play a role in the -delocalization between SWNTs and moiety units, leading to a strong electronic interaction between the chromophore and SWNTs units, and thus resulting in the considerable change in the absorption and luminescence spectra.

**Fig. S4** Luminescence excitation spectra monitored at 550 nm of *a*-SWNT-NI, *b*-SWNT-NI, the reference compounds NI-Ac, and NI.
